# Supplementary material for: Structural and thermal properties of Na2Mn(SO4)2·4H2O and Na2Ni(SO4)2·10H2O
Source: Royal Society of Chemistry journal article supplement (doi:10.1039/d0ra00301h), 2020-01-01
Supplement: d0ra00301h1.pdf [file d0ra00301h1.pdf]

## **Structural and Thermal Properties of $\text{Na}_2\text{Mn}(\text{SO}_4)_2 \cdot 4\text{H}_2\text{O}$ and $\text{Na}_2\text{Ni}(\text{SO}_4)_2 \cdot 10\text{H}_2\text{O}$**

Hamdi Ben Yahia<sup>a,\*</sup>, Alaa Alkhateeb<sup>a</sup>, Rachid Essehli<sup>b</sup>,

<sup>a</sup>Qatar Environment and Energy Research Institute (QEERI 2.0), Hamad Bin Khalifa University, Qatar Foundation, P.O. Box 34110, Doha, Qatar.

<sup>b</sup>Energy and Transportation Science Division, Oak Ridge National Laboratory, Oak Ridge, TN, USA

## Supplementary Information

**Table S1.** Anisotropic displacement parameters (in Å<sup>2</sup>) for Na<sub>2</sub>Mn(SO<sub>4</sub>)<sub>2</sub>•4H<sub>2</sub>O and Na<sub>2</sub>Ni(SO<sub>4</sub>)<sub>2</sub>•10H<sub>2</sub>O.

| Atom                                                                  | $U_{11}$    | $U_{22}$    | $U_{33}$    | $U_{12}$     | $U_{13}$    | $U_{23}$     |
|-----------------------------------------------------------------------|-------------|-------------|-------------|--------------|-------------|--------------|
| Na <sub>2</sub> Mn(SO <sub>4</sub> ) <sub>2</sub> •4H <sub>2</sub> O  |             |             |             |              |             |              |
| Na1                                                                   | 0.0237(3)   | 0.0203(3)   | 0.0176(3)   | 0.00056(19)  | 0.0016(2)   | -0.00062(19) |
| Mn1                                                                   | 0.01556(16) | 0.01332(17) | 0.01288(16) | -0.00115(8)  | 0.00297(10) | -0.00116(8)  |
| S1                                                                    | 0.01026(16) | 0.01219(17) | 0.01116(17) | 0.00034(9)   | 0.00097(10) | -0.00111(9)  |
| O1                                                                    | 0.0265(5)   | 0.0260(5)   | 0.0172(4)   | 0.0133(4)    | 0.0022(4)   | 0.0046(3)    |
| O2                                                                    | 0.0180(4)   | 0.0200(5)   | 0.0318(5)   | -0.0051(3)   | 0.0041(4)   | -0.0134(4)   |
| O3                                                                    | 0.0137(4)   | 0.0210(4)   | 0.0324(5)   | -0.0051(3)   | 0.0057(3)   | -0.0045(4)   |
| O4                                                                    | 0.0274(5)   | 0.0252(5)   | 0.0127(4)   | 0.0027(4)    | 0.0051(4)   | 0.0032(3)    |
| O5                                                                    | 0.0191(4)   | 0.0202(4)   | 0.0165(4)   | 0.0013(3)    | 0.0069(3)   | 0.0012(3)    |
| O6                                                                    | 0.0190(4)   | 0.0170(5)   | 0.0193(4)   | 0.0013(3)    | -0.0034(3)  | -0.0009(3)   |
| Na <sub>2</sub> Ni(SO <sub>4</sub> ) <sub>2</sub> •10H <sub>2</sub> O |             |             |             |              |             |              |
| Na1                                                                   | 0.0229(2)   | 0.0244(2)   | 0.0271(2)   | -0.00162(16) | 0.00538(19) | 0.00195(17)  |
| Ni1                                                                   | 0.01359(9)  | 0.01279(9)  | 0.0148(1)   | 0.00197(5)   | 0.00365(7)  | 0.00037(5)   |
| S1                                                                    | 0.01432(11) | 0.01336(10) | 0.01625(12) | 0.00044(7)   | 0.00523(9)  | -0.00046(7)  |
| O1                                                                    | 0.0270(4)   | 0.0195(3)   | 0.0293(4)   | 0.0047(3)    | 0.0177(3)   | 0.0018(3)    |
| O2                                                                    | 0.0216(4)   | 0.0275(4)   | 0.0188(4)   | 0.0037(3)    | 0.0019(3)   | 0.0020(3)    |
| O3                                                                    | 0.0236(4)   | 0.0404(5)   | 0.0273(4)   | -0.0147(3)   | 0.0114(3)   | -0.0109(4)   |
| O4                                                                    | 0.0318(4)   | 0.0150(3)   | 0.0280(4)   | 0.0062(3)    | 0.0061(3)   | 0.0022(3)    |
| O5                                                                    | 0.0205(4)   | 0.0191(3)   | 0.0283(4)   | 0.0016(3)    | -0.0035(3)  | 0.0030(3)    |
| O6                                                                    | 0.0255(4)   | 0.0207(3)   | 0.0231(4)   | 0.0075(3)    | 0.0028(3)   | -0.0051(3)   |
| O7                                                                    | 0.0254(4)   | 0.0235(4)   | 0.0250(4)   | 0.0030(3)    | 0.0054(3)   | 0.0036(3)    |
| O8                                                                    | 0.0284(4)   | 0.0297(4)   | 0.0289(5)   | 0.0038(3)    | 0.0097(4)   | -0.0042(3)   |
| O9                                                                    | 0.0233(4)   | 0.0195(3)   | 0.0260(4)   | -0.0027(3)   | 0.0117(3)   | -0.0018(3)   |

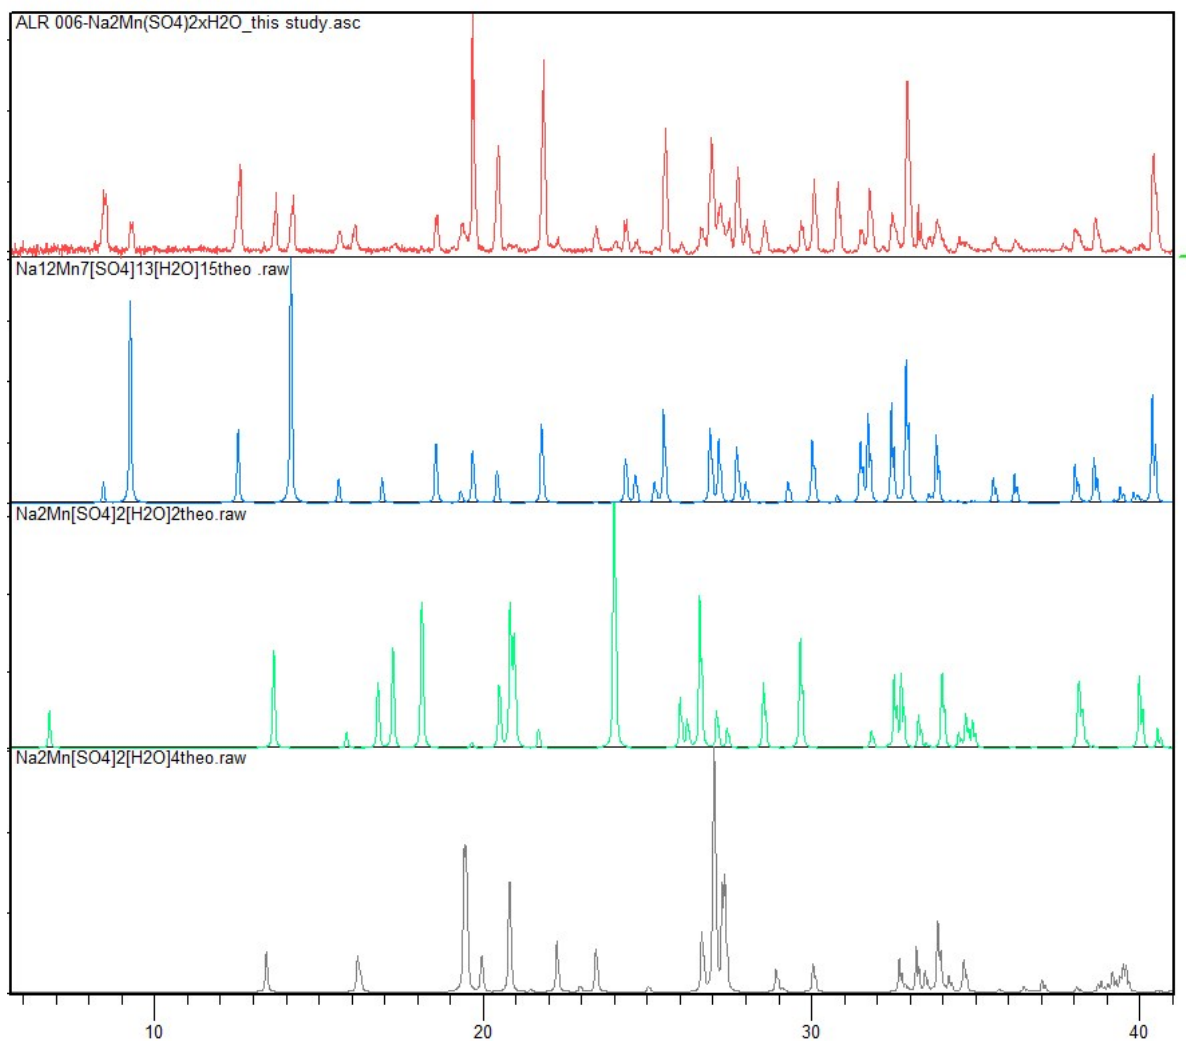

**Figure S1.** Theoretical powder X-ray diffraction patterns of  $\text{Na}_{12}\text{Mn}_7(\text{SO}_4)_{13}\cdot 15\text{H}_2\text{O}$ ,  $\text{Na}_2\text{Mn}(\text{SO}_4)_2\cdot 2\text{H}_2\text{O}$ , and  $\text{Na}_2\text{Mn}(\text{SO}_4)_2\cdot 4\text{H}_2\text{O}$  and experimental PXR pattern of the sample containing manganese that was prepared during this study (Cu-K $\alpha$  radiation).

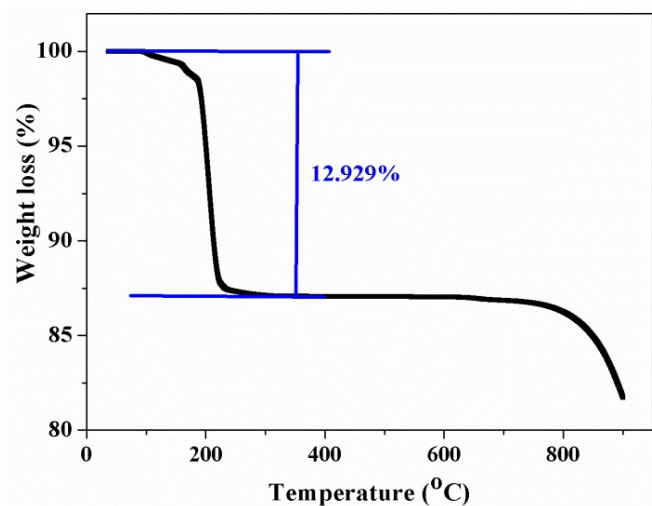

**Figure S2.** TGA thermal analysis of the sample containing manganese.
